# Supplementary material for: Heterogeneity of synaptic connectivity in the fly visual system
Source: PubMed Central journal article supplement (PMC10882054; doi:10.1038/s41467-024-45971-z), 2024-02-21
Supplement: 41467_2024_45971_MOESM3_ESM.pdf [file 41467_2024_45971_MOESM3_ESM.pdf]

## Description of Additional Supplementary Files

**Supplementary Data 1. Contributions to the dataset used in this study.** This table contains a sheet in which all segment IDs, neuron types, and % edits are shown, as well as a sheet containing the neuron types and respective numbers annotated by each contributor, and the number of total annotations.
