# Supplementary material for: Heterogeneity of synaptic connectivity in the fly visual system
Source: PubMed Central journal article supplement (PMC10882054; doi:10.1038/s41467-024-45971-z), 2024-02-21
Supplement: 41467_2024_45971_MOESM5_ESM.pdf [file 41467_2024_45971_MOESM5_ESM.pdf]

## Reporting Summary

Nature Portfolio wishes to improve the reproducibility of the work that we publish. This form provides structure for consistency and transparency in reporting. For further information on Nature Portfolio policies, see our [Editorial Policies](#) and the [Editorial Policy Checklist](#).

### Statistics

For all statistical analyses, confirm that the following items are present in the figure legend, table legend, main text, or Methods section.

n/a Confirmed

- The exact sample size ( $n$ ) for each experimental group/condition, given as a discrete number and unit of measurement
- A statement on whether measurements were taken from distinct samples or whether the same sample was measured repeatedly
- The statistical test(s) used AND whether they are one- or two-sided  
*Only common tests should be described solely by name; describe more complex techniques in the Methods section.*
- A description of all covariates tested
- A description of any assumptions or corrections, such as tests of normality and adjustment for multiple comparisons
- A full description of the statistical parameters including central tendency (e.g. means) or other basic estimates (e.g. regression coefficient) AND variation (e.g. standard deviation) or associated estimates of uncertainty (e.g. confidence intervals)
- For null hypothesis testing, the test statistic (e.g.  $F$ ,  $t$ ,  $r$ ) with confidence intervals, effect sizes, degrees of freedom and  $P$  value noted  
*Give  $P$  values as exact values whenever suitable.*
- For Bayesian analysis, information on the choice of priors and Markov chain Monte Carlo settings
- For hierarchical and complex designs, identification of the appropriate level for tests and full reporting of outcomes
- Estimates of effect sizes (e.g. Cohen's  $d$ , Pearson's  $r$ ), indicating how they were calculated

*Our web collection on [statistics for biologists](#) contains articles on many of the points above.*

### Software and code

Policy information about [availability of computer code](#)

Data collection

Leica LASX was used for ExM and Bruker Prairie View for 2P imaging data acquisition, Flywire.ai for connectomics work.

Data analysis

Preprocessing of ExM data was done by utilizing the VVDViewer (<https://github.com/JaneliaSciComp/VVDViewer>). Custom code in Matlab 2017b and Python 3.9 was used for data analysis and plotting. The code is available on GitHub: [https://github.com/silieslab/Cornean\\_Molina-Obando\\_etal\\_2024.git](https://github.com/silieslab/Cornean_Molina-Obando_etal_2024.git)  
Python tools:  
Anaconda, Visual Studio Code and Atom  
EM Python packages:  
numpy== 1.21.5, pandas==1.3.5, matplotlib==3.5.1, seaborn ==0.11.2,scipy=1.7.3, sklearn==1.0.2, statsmodels==0.13.5  
ExM Python packages:  
pyclesperanto-prototype==0.24.1, napari[pyqt5], PyQt5==5.15.9, napari-pyclesperanto-assistant==0.22.1, pydantic==1.10.9, typing-extensions==4.6.3, napari-roi==0.1.8, jupyterlab==4.0.9, pynrrd==1.0.0, seaborn==0.12.2, pandas==2.0.2, numpy==1.24.4, matplotlib==3.7.1  
2P Matlab: standard toolboxes, as well as signal processing, image processing, statistics and machine learning toolboxes

For manuscripts utilizing custom algorithms or software that are central to the research but not yet described in published literature, software must be made available to editors and reviewers. We strongly encourage code deposition in a community repository (e.g. GitHub). See the Nature Portfolio [guidelines for submitting code & software](#) for further information.

## Data

Policy information about [availability of data](#)

All manuscripts must include a [data availability statement](#). This statement should provide the following information, where applicable:

- Accession codes, unique identifiers, or web links for publicly available datasets
- A description of any restrictions on data availability
- For clinical datasets or third party data, please ensure that the statement adheres to our [policy](#)

Source data of this study can be found on Zenodo <https://zenodo.org/doi/10.5281/zenodo.10361474>.

## Research involving human participants, their data, or biological material

Policy information about studies with [human participants or human data](#). See also policy information about [sex, gender \(identity/presentation\), and sexual orientation](#) and [race, ethnicity and racism](#).

Reporting on sex and gender

Reporting on race, ethnicity, or other socially relevant groupings

Population characteristics

Recruitment

Ethics oversight

Note that full information on the approval of the study protocol must also be provided in the manuscript.

## Field-specific reporting

Please select the one below that is the best fit for your research. If you are not sure, read the appropriate sections before making your selection.

Life sciences  Behavioural & social sciences  Ecological, evolutionary & environmental sciences

For a reference copy of the document with all sections, see [nature.com/documents/nr-reporting-summary-flat.pdf](https://www.nature.com/documents/nr-reporting-summary-flat.pdf)

## Life sciences study design

All studies must disclose on these points even when the disclosure is negative.

Sample size

Data exclusions

Replication

Randomization

Blinding

## Reporting for specific materials, systems and methods

We require information from authors about some types of materials, experimental systems and methods used in many studies. Here, indicate whether each material, system or method listed is relevant to your study. If you are not sure if a list item applies to your research, read the appropriate section before selecting a response.

## Materials & experimental systems

- n/a  Involved in the study
- Antibodies
- Eukaryotic cell lines
- Palaeontology and archaeology
- Animals and other organisms
- Clinical data
- Dual use research of concern
- Plants

## Methods

- n/a  Involved in the study
- ChIP-seq
- Flow cytometry
- MRI-based neuroimaging

## Antibodies

- Antibodies used chicken anti-GFP, Abcam #13970, rabbit anti-DsRed, Takara Bio Clontech #632496, goat anti-chicken Alexa Fluor 488, Jackson ImmunoResearch #103-545-155, goat anti-rabbit ATTO 647N, Sigma #40839
- Validation Abcam #13970 was validated in ICC (<https://www.abcam.com/products/primary-antibodies/gfp-antibody-ab13970.html?productWallTab=Questions>).  
Takara Bio Clontech #632496, was validated by Western Blot (<https://www.takarabio.com/documents/Certificate%20of%20Analysis/632543/632543-021313.pdf>).

## Animals and other research organisms

Policy information about [studies involving animals](#); [ARRIVE guidelines](#) recommended for reporting animal research, and [Sex and Gender in Research](#)

- Laboratory animals Drosophila melanogaster females from 1 to 9 days post eclosion were used in this study.  
Strains:  
w+;Tm9[24C08]-LexAp65[attP40]. UAS-brp[short]::mCherry/ Tm16[82C05]-AD[attP40]; LexAop-rCD2::GFP/Tm16[52D11]-DBD[attP2]  
w+;Tm9[24C08]-LexAp65[attP40]. UAS-brp[short]::mCherry/ Dm12-AD[attP40]; LexAop-rCD2::GFP/Dm12-DBD[attP2]  
Dm12-split-Gal4 (SS00359, Aljoscha Nern, Janelia Research campus)  
w+;Tm9[24C08]-LexAp65[attP40]. UAS-brp[short]::mCherry/ C3[R26H02]-AD; LexAop-rCD2::GFP/C3[R29G11]-DBD  
w/w+;Tm924C08-LexA,lexAop-GCaMP6f/+;+/  
w+, norpA; Tm9[24C08]-LexA,lexAop-GCaMP6f/+;L3[0595]/+  
w+, norpA; Tm9[24C08]-LexA,lexAop-GCaMP6f/+;Tm1[27b]/+  
w+, norpA; Tm9[24C08]-LexA,lexAop-GCaMP6f/R35A03-AD;R29G11-DBD/+
- Wild animals The study did not involve wild animals.
- Reporting on sex The FAFB dataset is an EM reconstruction of one female fly. Thus, connectome analysis was complemented by also using female flies in confocal / ExM analysis. There is no known relevance of sex to the subject under investigation here / there is no known sexual dimorphism in peripheral visual circuitry of the fly eye. Differentiation of sex was done by the sex organs, shape and colour of the abdomen.
- Field-collected samples The study did not involve field-collected samples.
- Ethics oversight No ethical approval was required for fly experiments, the lab has all the permits to work with genetically modified organisms.

Note that full information on the approval of the study protocol must also be provided in the manuscript.

## Plants

- Seed stocks The study did not involve seed stocks.
- Novel plant genotypes The study did not involve novel plant genotypes.
- Authentication The study did not involve plants.
